# Supplementary material for: Endoplasmic Reticulum Stress Plays a Key Role in the Pathogenesis of Diabetic Peripheral Neuropathy
Source: PubMed Central journal article supplement — Diabetes. 2013 Feb 14;62(3):944–52. doi: 10.2337/db12-0716 (PMC3581201; doi:10.2337/db12-0716), 2013-02-14

SUPPLEMENTARY DATA

**Supplementary Figure 1.** (A,C,E,G) Representative Western blot analyses of phospho-eIF2 $\alpha$  (A), ERO1 $\alpha$  (C), CHOP (E), and BiP/GRP78(G), and (B, D, F, and H) their content (densitometry) in sciatic nerves of non-diabetic and diabetic rats maintained with or without 4-phenylbutyric acid treatment for 12 weeks after induction of streptozotocin diabetes ( a prevention study). C – control, D – diabetic, PBA – 4-phenylbutyric acid. Mean  $\pm$  SEM, n = 7-8 per group. \*\* p < 0.01 vs non-diabetic controls; #,## p < 0.05 and < 0.01 vs diabetic rats maintained without 4-phenylbutyric acid treatment.

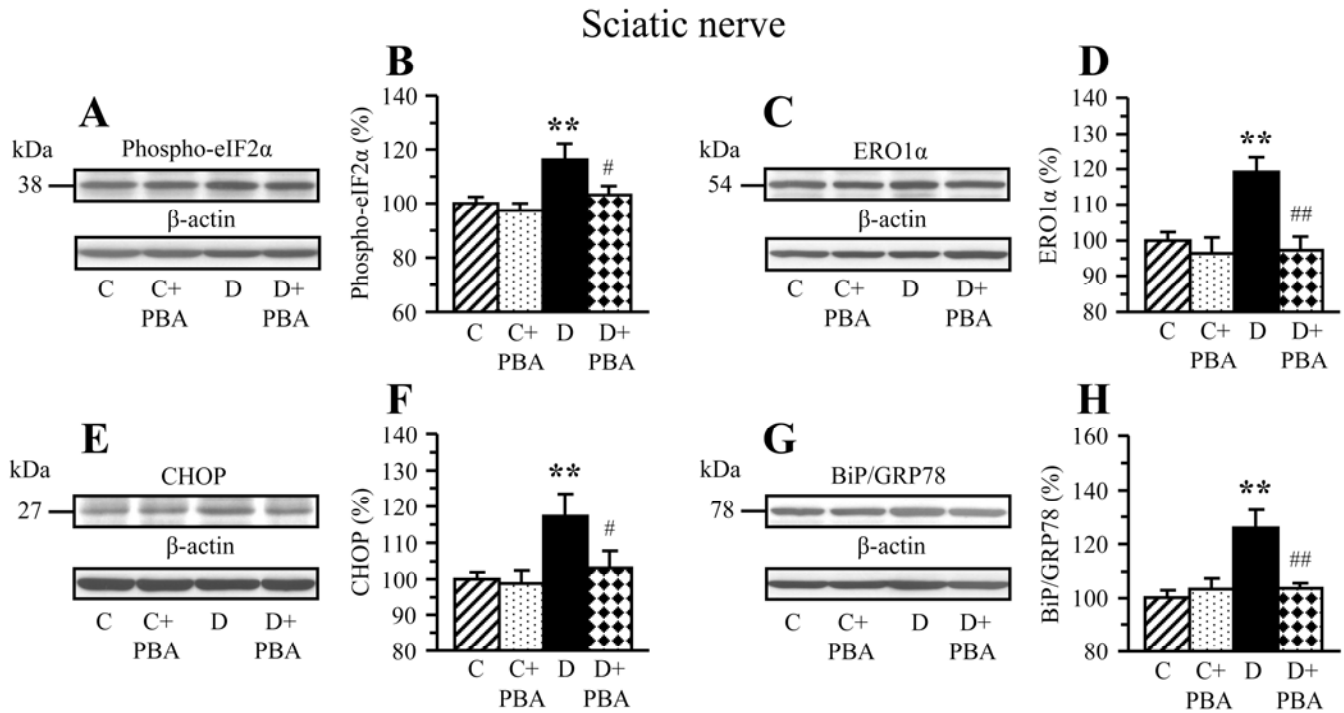

Supplement: supp_db12-0716_DB120716SupplementaryData.pdf [file supp_db12-0716_DB120716SupplementaryData.pdf]
